# Supplementary material for: A co-solvent hydrolysis strategy for the production of biofuels: process synthesis and technoeconomic analysis
Source: Royal Society of Chemistry journal article supplement (doi:10.1039/c6re00227g), 2017-01-01
Supplement: c6re00227g1.pdf [file c6re00227g1.pdf]

## A co-solvent hydrolysis strategy for the production of biofuels: Process synthesis and techno-economic analysis

Wangyun Won,<sup>a,b</sup> Ali Hussain Motagamwala,<sup>a,b</sup> James A. Dumesic,<sup>a,b</sup> Christos T. Maravelias<sup>\*a,b</sup>

<sup>a</sup> Department of Chemical and Biological Engineering, University of Wisconsin-Madison, Madison, WI 53706, USA

<sup>b</sup> DOE Great Lakes Bioenergy Research Center, University of Wisconsin-Madison, 1552 University Ave, Madison, WI 53726, USA

### SUPPLEMENTARY MATERIAL

\* Corresponding author (Email: maravelias@wisc.edu)

#### A. Data regression for liquid-liquid equilibrium of GVL-toluene-water system

To accurately model the liquid-liquid equilibrium (LLE) in the toluene-based extractor and liquid-liquid separator, we conducted the LLE experiments for a mixture of GVL/toluene/water at different temperatures (near the operating temperature of the separation processes) and corrected the key coefficients of the non-random two-liquid (NRTL) model based on the experimental data obtained. The NRTL model can be written as (Renon and Prausnitz, 1968)

$$\ln \gamma_i = \frac{\sum_j x_j \tau_{ji} G_{ji}}{\sum_k x_k G_{ki}} + \sum_j \frac{x_j G_{ij}}{\sum_k x_k G_{kj}} \left( \tau_{ij} - \frac{\sum_m x_m \tau_{mj} G_{mj}}{\sum_k x_k G_{kj}} \right) \quad (1)$$

where

$$G_{ij} = \exp(-\alpha_{ij} \tau_{ij}) \quad (2a)$$

$$\tau_{ij} = a_{ij} + b_{ij}/T + e_{ij} \ln T + f_{ij} T \quad (2b)$$

$$\alpha_{ij} = c_{ij} + d_{ij}(T - 273.15) \quad (2c)$$

In the above, the subscripts (i.e.,  $i$ ,  $j$ ,  $k$ , and  $m$ ) denote components.  $\gamma_i$  represents the activity coefficient of component  $i$ ,  $x_j$  indicates the mole fraction of component  $j$  in the liquid phase considered, and  $T$  is temperature. The binary parameters  $a_{ij}$ ,  $b_{ij}$ ,  $e_{ij}$ , and  $f_{ij}$  are unsymmetrical, e.g.,  $a_{ij}$  may not be equal to  $a_{ji}$ . Here, we chose  $a_{ij}$  and  $b_{ij}$  to be estimated, while fixing  $c_{ij} = 0.3$  and others equal to zero. The experimental data used for the estimation of the parameters are presented in Table A.1. We used default parameter values in Aspen Plus database as the initial point for parameter estimation. The regression results are summarized in Table A.2.

**Table A.1.** LLE experimental data (mole fraction of components in organic and aqueous phases) for a mixture of GVL/toluene/water.

| Temperature (K) | Organic phase |         |         | Aqueous phase |         |         |
|-----------------|---------------|---------|---------|---------------|---------|---------|
|                 | Water         | GVL     | Toluene | Water         | GVL     | Toluene |
| 313             | 0.06121       | 0.77429 | 0.16450 | 0.86357       | 0.13201 | 0.00442 |
| 323             | 0.10863       | 0.68242 | 0.20895 | 0.84203       | 0.15202 | 0.00595 |
| 333             | 0.15344       | 0.61521 | 0.23135 | 0.82543       | 0.16772 | 0.00685 |
| 343             | 0.19926       | 0.56204 | 0.23870 | 0.81813       | 0.17432 | 0.00755 |
| 353             | 0.25627       | 0.49873 | 0.24500 | 0.81578       | 0.17590 | 0.00832 |

**Table A.2.** NRTL parameter values for a mixture of GVL/toluene/water.

| Parameter | Component | Component | Default* | Estimates* |
|-----------|-----------|-----------|----------|------------|
|           | <i>i</i>  | <i>j</i>  |          |            |
| $a_{ij}$  | Water     | Toluene   | 0        | 14.215     |
|           | Toluene   | Water     | 0        | -0.524     |
|           | Water     | GVL       | 0        | -3.121     |
|           | GVL       | Water     | 0        | 7.568      |
|           | Toluene   | GVL       | 0        | 34.707     |
|           | GVL       | Toluene   | 0        | 3.627      |
| $b_{ij}$  | Water     | Toluene   | 0        | -2471.831  |
|           | Toluene   | Water     | 0        | 19.061     |
|           | Water     | GVL       | 0        | 1363.416   |
|           | GVL       | Water     | 0        | -919.849   |
|           | Toluene   | GVL       | 0        | 4241.894   |
|           | GVL       | Toluene   | 0        | -954.991   |

\*  $a_{ij}$  is dimensionless, and  $b_{ij}$  is in K.

Figure A.1 demonstrates fitting results of the experimental data (symbols) to the regression phase equilibria model (lines). In process analysis, the liquid-liquid equilibrium for the mixture of GVL/toluene/water was calculated from these estimated curves.

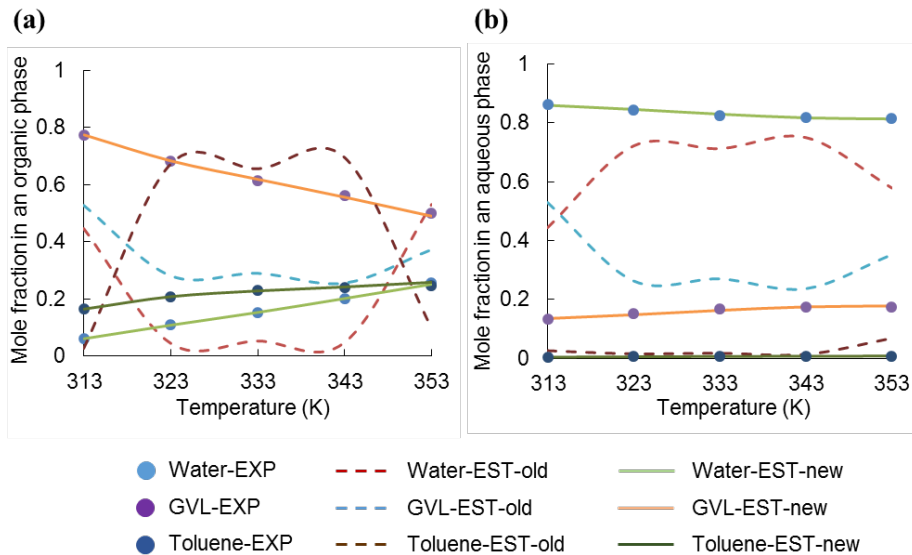

**Figure A.1.** LLE experimental data (points) and fitting results (lines). NRTL was used to calculate liquid activity coefficients for a mixture of GVL/toluene/water. The experimental data represent average values of multiple experiments. EXP: experimental data, EST: estimated data (using process model).

## B. Heat integration

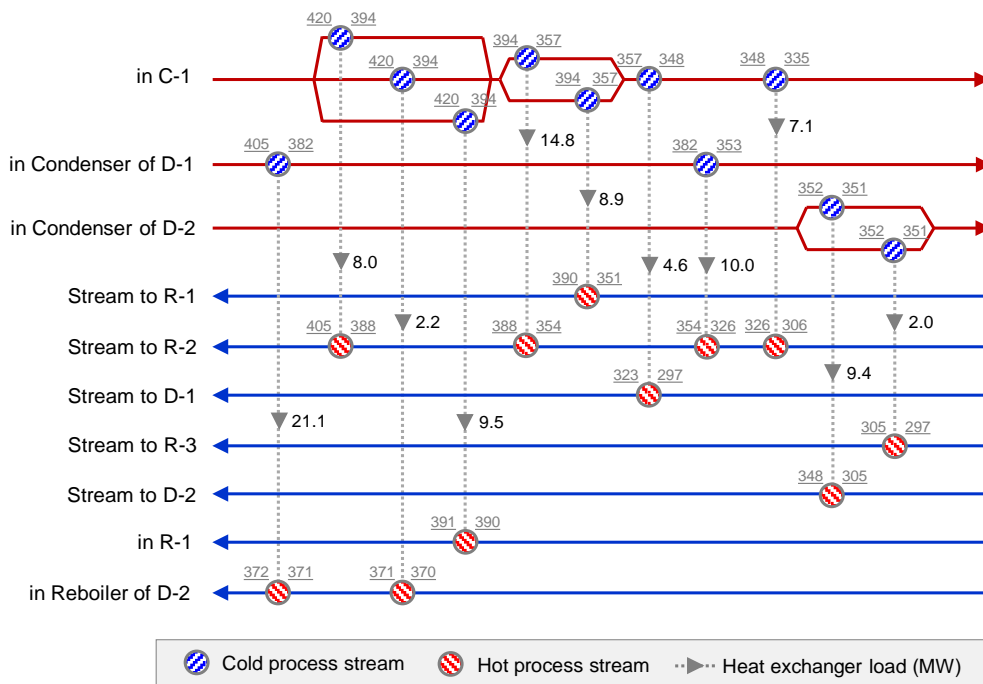

**Figure B.1.** Heat exchanger network. Numbers in black denote heat load (MW) and underlined numbers in grey denote temperature (K).

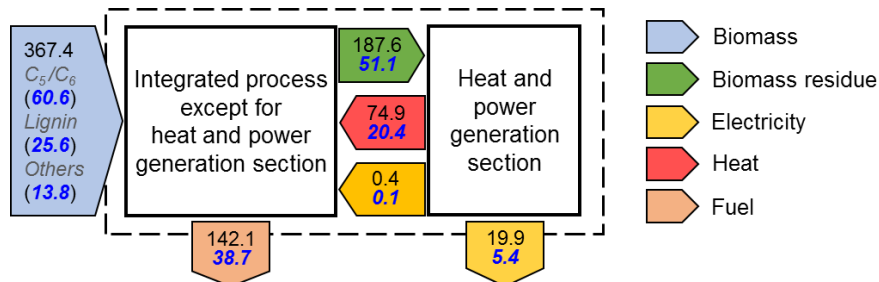

**Figure B.2.** Energy flow diagram after heat integration. Numbers in black represent energy content (MW) and numbers in blue (bold and italic) indicate energy flows as percentage of the energy content of biomass feedstock.

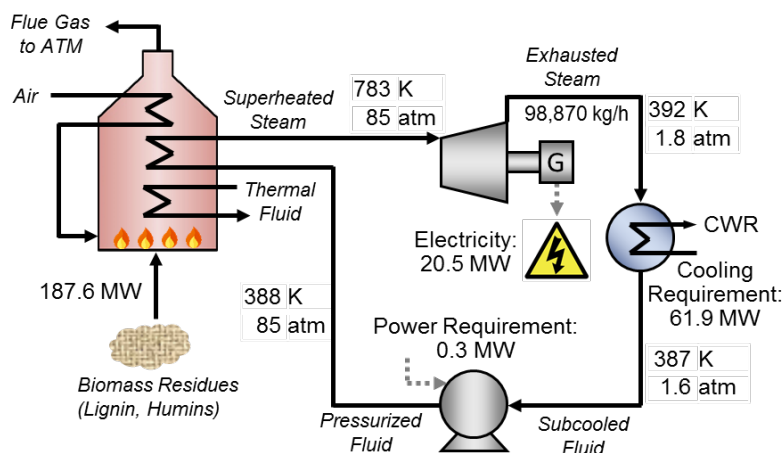

**Figure B.3.** Process flow diagram for the heat and power generation section.

## C. Important stream information and ethanol yield

**Table C.1.** Process stream information for selected streams in the flowsheet shown in Fig. 2. (Abbreviations: GVL,  $\gamma$ -Valerolactone; HMF, 5-hydroxymethylfurfural).

| Stream number                  | 1    | 8     | 9     | 11    | 13    | 15    | 18    | 19    | 20    | 22    | 24   | 28    | 29   | 31    |
|--------------------------------|------|-------|-------|-------|-------|-------|-------|-------|-------|-------|------|-------|------|-------|
| Mass flow (ton/h)              |      |       |       |       |       |       |       |       |       |       |      |       |      |       |
| Cellulose                      | 31.9 | 0.0   | 0.0   | 0.0   | 0.0   | 0.0   | 0.0   | 0.0   | 0.0   | 0.0   | 0.0  | 0.0   | 0.0  | 0.0   |
| Hemicellulose                  | 18.9 | 0.0   | 0.0   | 0.0   | 0.0   | 0.0   | 0.0   | 0.0   | 0.0   | 0.0   | 0.0  | 0.0   | 0.0  | 0.0   |
| Toluene                        | 0.0  | 91.8  | 91.8  | 79.2  | 0.0   | 0.0   | 199.7 | 0.0   | 0.0   | 0.0   | 0.0  | 0.1   | 0.0  | 0.1   |
| GVL                            | 0.0  | 468.1 | 468.1 | 260.1 | 166.6 | 166.1 | 214.1 | 5.5   | 5.5   | 5.5   | 0.0  | 202.0 | 85.5 | 203.4 |
| H <sub>2</sub> O               | 0.0  | 138.0 | 138.0 | 4.2   | 133.2 | 124.3 | 1.2   | 124.9 | 124.9 | 162.5 | 0.1  | 0.0   | 0.0  | 0.2   |
| H <sub>2</sub> SO <sub>4</sub> | 0.0  | 9.0   | 9.0   | 0.0   | 9.0   | 8.4   | 0.0   | 8.4   | 0.0   | 0.0   | 0.0  | 0.0   | 0.0  | 0.0   |
| C <sub>6</sub> sugar           | 0.0  | 30.7  | 30.7  | 1.7   | 28.7  | 26.8  | 1.6   | 25.5  | 25.5  | 3.3   | 0.0  | 1.6   | 0.7  | 1.6   |
| C <sub>5</sub> sugar           | 0.0  | 16.9  | 16.9  | 0.7   | 16.1  | 15.1  | 0.9   | 14.3  | 14.3  | 1.9   | 0.0  | 0.8   | 0.4  | 0.8   |
| HMF                            | 0.0  | 12.6  | 12.6  | 4.5   | 7.4   | 6.9   | 3.6   | 4.1   | 4.1   | 4.1   | 0.0  | 3.4   | 1.5  | 3.4   |
| Furfural                       | 0.0  | 15.7  | 15.7  | 3.6   | 11.5  | 10.8  | 3.5   | 8.0   | 8.0   | 8.0   | 0.0  | 3.3   | 1.4  | 3.3   |
| Levulinic acid                 | 0.0  | 9.4   | 9.4   | 1.5   | 7.6   | 7.4   | 4.0   | 3.8   | 3.8   | 3.8   | 0.0  | 3.8   | 1.6  | 2.2   |
| Formic acid                    | 0.0  | 3.7   | 3.7   | 0.6   | 3.0   | 2.9   | 1.6   | 1.5   | 1.5   | 1.5   | 0.0  | 1.5   | 0.6  | 0.9   |
| Ethanol                        | 0.0  | 0.0   | 0.0   | 0.0   | 0.0   | 0.0   | 0.0   | 0.0   | 0.0   | 17.7  | 17.7 | 0.0   | 0.0  | 0.0   |
| CO <sub>2</sub>                | 0.0  | 0.0   | 0.0   | 0.0   | 0.0   | 0.0   | 0.0   | 0.0   | 0.0   | 16.9  | 0.0  | 0.0   | 0.0  | 0.0   |
| Lignin                         | 13.3 | 16.6  | 16.6  | 2.4   | 13.8  | 0.6   | 0.8   | 0.2   | 0.2   | 0.2   | 0.0  | 0.8   | 0.3  | 0.8   |
| Humins                         | 0.0  | 8.0   | 8.0   | 0.0   | 8.0   | 0.3   | 0.2   | 0.1   | 0.1   | 0.1   | 0.0  | 0.2   | 0.1  | 0.2   |
| Total flow (ton/h)             | 64.1 | 820.5 | 820.5 | 358.4 | 405.1 | 369.5 | 431.3 | 196.5 | 188.1 | 225.7 | 17.8 | 217.6 | 92.1 | 216.9 |
| Temperature (K)                | 298  | 420   | 298   | 298   | 298   | 298   | 299   | 299   | 299   | 305   | 311  | 473   | 473  | 481   |
| Pressure (atm)                 | 1    | 20    | 20    | 20    | 20    | 1     | 1     | 1     | 1     | 1     | 1    | 1     | 35   | 20    |

**Table C.2.** Fuel production rates for different strategies.

| Strategy                                                        | Strategy A |             | Strategy B<br>(Han et al., 2015) | Strategy C<br>(Humbird et al., 2011) |
|-----------------------------------------------------------------|------------|-------------|----------------------------------|--------------------------------------|
|                                                                 | Basic      | Alternative |                                  |                                      |
| Fuel production rate<br>(10 <sup>6</sup> GGE yr <sup>-1</sup> ) | 35.7       | 38.4        | 39.8                             | 40.2                                 |

## D. Economic evaluation

**Table D.1.** List of major economic parameters and assumptions.

|                                                                                                     |       |
|-----------------------------------------------------------------------------------------------------|-------|
| Corn stover price (\$ per ton) <sup>a</sup>                                                         | 58.5  |
| Sulfuric acid price (\$ per ton) <sup>b</sup>                                                       | 35.0  |
| Lime price (\$ per ton) <sup>b</sup>                                                                | 99.0  |
| Water price (\$ per ton) <sup>b</sup>                                                               | 0.23  |
| Electricity price (\$ per kWh) <sup>a</sup>                                                         | 0.057 |
| Toluene price (\$ per ton) <sup>c</sup>                                                             | 669.0 |
| Gypsum disposal (\$ per ton) <sup>b</sup>                                                           | 30.9  |
| RuSn(1:4)/C catalyst (\$ per kg) <sup>d</sup>                                                       | 540.0 |
| Yeast price (\$ per gallon of ethanol) <sup>e</sup>                                                 | 0.01  |
| Wastewater treatment cost (\$ per ton) <sup>b</sup>                                                 | 36.0  |
| Refrigerated water (\$ per ton) <sup>f</sup>                                                        | 0.185 |
| Internal rate of return (%) <sup>a</sup>                                                            | 10.0  |
| Plant financing by equity (%) <sup>a</sup>                                                          | 40.0  |
| Plant life (years) <sup>a</sup>                                                                     | 30.0  |
| Income tax rate (%) <sup>a</sup>                                                                    | 35.0  |
| Interest rate for debt financing (%) <sup>a</sup>                                                   | 8.0   |
| Term for debt financing (years) <sup>a</sup>                                                        | 10.0  |
| General plant depreciation (years) <sup>a</sup>                                                     | 7.0   |
| Steam plant depreciation (years) <sup>a</sup>                                                       | 20.0  |
| Working capital (% of fixed capital investment) <sup>a</sup>                                        | 5.0   |
| On-stream percentage after startup (%) <sup>a</sup>                                                 | 96.0  |
| Startup time (years) <sup>a</sup>                                                                   | 0.25  |
| Revenue and costs during startup                                                                    |       |
| Revenue (% of normal) <sup>a</sup>                                                                  | 50.0  |
| Variable costs (% of normal) <sup>a</sup>                                                           | 75.0  |
| Fixed costs (% of normal) <sup>a</sup>                                                              | 100.0 |
| Construction period (years) <sup>a</sup>                                                            | 3.0   |
| First 12 months' expenditures (%) <sup>a</sup>                                                      | 8.0   |
| Next 12 months' expenditures (%) <sup>a</sup>                                                       | 60.0  |
| Last 12 months' expenditures (%) <sup>a</sup>                                                       | 32.0  |
| <sup>a</sup> Taken from Humbird et al. (2011)                                                       |       |
| <sup>b</sup> Taken from Kazi et al. (2010)                                                          |       |
| <sup>c</sup> Taken from S&P Global Platts                                                           |       |
| <sup>d</sup> Taken from Sen et al. (2012) (10% of the catalyst is refurbished every 3 months)       |       |
| <sup>e</sup> Taken from McAloon et al. (2000); yeast is utilized as a raw material for fermentation |       |
| <sup>f</sup> Taken from Turton et al. (2008)                                                        |       |

**Table D.2.** Cost of major equipment units.

| Section                               | Equipment type  | Equipment ID            | Equipment cost (\$) | Installed cost (\$) | Calculation method            |
|---------------------------------------|-----------------|-------------------------|---------------------|---------------------|-------------------------------|
| Two-Stage Biomass conversion Reaction | Reactor         | R-1/R-2                 | 26,070,195          | 59,480,124          | Scaled on area <sup>a,c</sup> |
|                                       | Pump            | P-1/P-2/P-3/P-4/<br>P-5 | 165,308             | 380,209             | APEA <sup>b</sup>             |
|                                       | Separator       | S-1                     | 11,737,916          | 12,207,432          | Scaled on flow <sup>a</sup>   |
|                                       | Vessel          | V-1                     | 151,840             | 182,208             | Scaled on flow <sup>a</sup>   |
| Liquid-liquid Separation              | Cooler          | C-1                     | 2,156,925           | 4,745,236           | APEA <sup>b</sup>             |
|                                       | Separator       | S-2                     | 35,008              | 52,511              | APEA <sup>b</sup>             |
| Solid Recovery                        | Separator       | S-3/S-6                 | 12,053,991          | 12,536,150          | Scaled on flow <sup>a,d</sup> |
|                                       | Separator       | S-7                     | 65,723              | 118,301             | APEA <sup>b</sup>             |
| Extraction/<br>Toluene Separation     | Extractor       | E-1                     | 121,350             | 266,971             | APEA <sup>b</sup>             |
|                                       | Column          | D-1                     | 921,433             | 1,653,015           | APEA <sup>b</sup>             |
| GVL Production                        | Reactor         | R-4                     | 128,202             | 256,404             | APEA <sup>b,e</sup>           |
|                                       | Pump            | P-6                     | 47,217              | 108,600             | APEA <sup>b</sup>             |
| Fermentation                          | Reactor package | R-3                     | 4,567,766           | 5,938,096           | Scaled on flow <sup>a</sup>   |
| Wastewater Treatment                  | Package         | -                       | 32,245,661          | 32,245,661          | Scaled on flow <sup>a,f</sup> |

<sup>a</sup> The cost is estimated using exponential scaling expression (based on size and cost data presented in the NREL reports (Humbird et al., 2011)).

<sup>b</sup> The cost is determined using Aspen Process Economic Analyzer (APEA, 2011)

<sup>c</sup> If the cost is estimated following the approach of Davis et al. (2015), the cost is 100.2 MM\$.

<sup>d</sup> If the cost is estimated based on the cost data in Davis et al. (2015), the cost is 23.1 MM\$.

<sup>e</sup> If the reactor cost is estimated using the scaling expression for the condensation reactor (573 K, 62 atm) in Davis et al. (2015), which is the most similar reactor to R-4 (473 K, 35 atm), the cost is 2.5 MM\$.

<sup>f</sup> The cost is scaled based on mass flow rate following the approach of Humbird et al. (2011). If the cost is scaled based on both mass flow rate and chemical oxygen demand (COD) (Davis et al., 2013), the cost is 54.9 MM\$.

## E. Discounted cash flow for the process design

**Table E.1.** Discounted cash flow calculations.

| Year                                | -2         | -1          | 0           | 1            | 2            | 3            | 4            | 5            | 6            | 7            | 8            |
|-------------------------------------|------------|-------------|-------------|--------------|--------------|--------------|--------------|--------------|--------------|--------------|--------------|
| Fixed capital investment            | 11,277,781 | 84,583,359  | 45,111,125  |              |              |              |              |              |              |              |              |
| Land                                | 1,848,000  |             |             |              |              |              |              |              |              |              |              |
| Working capital                     |            |             | 17,621,533  |              |              |              |              |              |              |              |              |
| Loan payment                        |            |             |             | 31,513,537   | 31,513,537   | 31,513,537   | 31,513,537   | 31,513,537   | 31,513,537   | 31,513,537   | 31,513,537   |
| Loan interest payment               | 1,353,334  | 11,503,337  | 16,916,672  | 16,916,672   | 15,748,923   | 14,487,754   | 13,125,691   | 11,654,663   | 10,065,953   | 8,350,147    | 6,497,075    |
| Loan principal                      | 16,916,672 | 143,791,711 | 211,458,399 | 196,861,533  | 181,096,919  | 164,071,136  | 145,683,289  | 125,824,416  | 104,376,832  | 81,213,441   | 56,196,980   |
| Ethanol sales                       |            |             |             | 99,089,968   | 113,245,678  | 113,245,678  | 113,245,678  | 113,245,678  | 113,245,678  | 113,245,678  | 113,245,678  |
| By-product (electricity) credit     |            |             |             | 8,361,557    | 9,556,066    | 9,556,066    | 9,556,066    | 9,556,066    | 9,556,066    | 9,556,066    | 9,556,066    |
| Total annual sales                  |            |             |             | 107,451,526  | 122,801,744  | 122,801,744  | 122,801,744  | 122,801,744  | 122,801,744  | 122,801,744  | 122,801,744  |
| Annual manufacturing cost           |            |             |             |              |              |              |              |              |              |              |              |
| Feedstock                           |            |             |             | 39,567,938   | 45,220,500   | 45,220,500   | 45,220,500   | 45,220,500   | 45,220,500   | 45,220,500   | 45,220,500   |
| Baghouse bags                       |            |             |             | 431,272      |              |              |              |              | 431,272      |              |              |
| Other variable costs                |            |             |             | 16,696,288   | 17,809,374   | 17,809,374   | 17,809,374   | 17,809,374   | 17,809,374   | 17,809,374   | 17,809,374   |
| Fixed operating costs               |            |             |             | 10,293,354   | 10,293,354   | 10,293,354   | 10,293,354   | 10,293,354   | 10,293,354   | 10,293,354   | 10,293,354   |
| Total product cost                  |            |             |             | 66,988,852   | 73,323,228   | 73,323,228   | 73,323,228   | 73,323,228   | 73,754,500   | 73,323,228   | 73,323,228   |
| Annual depreciation                 |            |             |             |              |              |              |              |              |              |              |              |
| General plant writedown             |            |             |             | 14.29%       | 24.49%       | 17.49%       | 12.49%       | 8.93%        | 8.92%        | 8.93%        | 4.46%        |
| Depreciation charge                 |            |             |             | 42,172,533   | 72,274,691   | 51,616,347   | 36,860,387   | 26,354,144   | 26,324,632   | 26,354,144   | 13,162,316   |
| Remaining value                     |            |             |             | 252,946,661  | 180,671,971  | 129,055,624  | 92,195,236   | 65,841,092   | 39,516,460   | 13,162,316   | 0            |
| Steam plant writedown               |            |             |             | 3.75%        | 7.22%        | 6.68%        | 6.18%        | 5.71%        | 5.29%        | 4.89%        | 4.52%        |
| Depreciation charge                 |            |             |             | 2,149,180    | 4,137,315    | 3,826,687    | 3,540,129    | 3,274,204    | 3,028,911    | 2,801,385    | 2,591,625    |
| Remaining value                     |            |             |             | 55,162,290   | 51,024,975   | 47,198,288   | 43,658,158   | 40,383,954   | 37,355,043   | 34,553,658   | 31,962,034   |
| Net revenue                         |            |             |             | (20,775,711) | (42,682,413) | (20,452,272) | (4,047,692)  | 8,195,504    | 9,627,747    | 11,972,841   | 27,227,500   |
| Losses forward                      |            |             |             |              | (20,775,711) | (63,458,123) | (83,910,395) | (87,958,087) | (79,762,583) | (70,134,836) | (58,161,995) |
| Taxable income                      |            |             |             | (20,775,711) | (63,458,123) | (83,910,395) | (87,958,087) | (79,762,583) | (70,134,836) | (58,161,995) | (30,934,495) |
| Income tax                          |            |             |             | 0            | 0            | 0            | 0            | 0            | 0            | 0            | 0            |
| Annual cash income                  |            |             |             | 8,949,137    | 17,964,979   | 17,964,979   | 17,964,979   | 17,964,979   | 17,533,707   | 17,964,979   | 17,964,979   |
| Discount factor                     | 1.2100     | 1.1000      | 1.0000      | 0.9091       | 0.8264       | 0.7513       | 0.6830       | 0.6209       | 0.5645       | 0.5132       | 0.4665       |
| Annual present value                |            |             |             | 8,135,579    | 14,847,090   | 13,497,354   | 12,270,322   | 11,154,838   | 9,897,320    | 9,218,875    | 8,380,795    |
| Total capital investment + interest | 17,519,729 | 105,695,366 | 79,649,330  |              |              |              |              |              |              |              |              |

| Year                                | 9            | 10          | 11          | 12          | 13          | 14          | 15          | 16          | 17          | 18          | 19          |
|-------------------------------------|--------------|-------------|-------------|-------------|-------------|-------------|-------------|-------------|-------------|-------------|-------------|
| Fixed capital investment            |              |             |             |             |             |             |             |             |             |             |             |
| Land                                |              |             |             |             |             |             |             |             |             |             |             |
| Working capital                     |              |             |             |             |             |             |             |             |             |             |             |
| Loan payment                        | 31,513,537   | 31,513,537  | 0           | 0           | 0           | 0           | 0           | 0           | 0           | 0           | 0           |
| Loan interest payment               | 4,495,758    | 2,334,336   | 0           | 0           | 0           | 0           | 0           | 0           | 0           | 0           | 0           |
| Loan principal                      | 29,179,201   | 0           | 0           | 0           | 0           | 0           | 0           | 0           | 0           | 0           | 0           |
| Ethanol sales                       | 113,245,678  | 113,245,678 | 113,245,678 | 113,245,678 | 113,245,678 | 113,245,678 | 113,245,678 | 113,245,678 | 113,245,678 | 113,245,678 | 113,245,678 |
| By-product (electricity) credit     | 9,556,066    | 9,556,066   | 9,556,066   | 9,556,066   | 9,556,066   | 9,556,066   | 9,556,066   | 9,556,066   | 9,556,066   | 9,556,066   | 9,556,066   |
| Total annual sales                  | 122,801,744  | 122,801,744 | 122,801,744 | 122,801,744 | 122,801,744 | 122,801,744 | 122,801,744 | 122,801,744 | 122,801,744 | 122,801,744 | 122,801,744 |
| Annual manufacturing cost           |              |             |             |             |             |             |             |             |             |             |             |
| Feedstock                           | 45,220,500   | 45,220,500  | 45,220,500  | 45,220,500  | 45,220,500  | 45,220,500  | 45,220,500  | 45,220,500  | 45,220,500  | 45,220,500  | 45,220,500  |
| Baghouse bags                       |              |             | 431,272     |             |             |             |             | 431,272     |             |             |             |
| Other variable costs                | 17,809,374   | 17,809,374  | 17,809,374  | 17,809,374  | 17,809,374  | 17,809,374  | 17,809,374  | 17,809,374  | 17,809,374  | 17,809,374  | 17,809,374  |
| Fixed operating costs               | 10,293,354   | 10,293,354  | 10,293,354  | 10,293,354  | 10,293,354  | 10,293,354  | 10,293,354  | 10,293,354  | 10,293,354  | 10,293,354  | 10,293,354  |
| Total product cost                  | 73,323,228   | 73,323,228  | 73,754,500  | 73,323,228  | 73,323,228  | 73,323,228  | 73,323,228  | 73,754,500  | 73,323,228  | 73,323,228  | 73,323,228  |
| Annual depreciation                 |              |             |             |             |             |             |             |             |             |             |             |
| General plant writedown             |              |             |             |             |             |             |             |             |             |             |             |
| Depreciation charge                 |              |             |             |             |             |             |             |             |             |             |             |
| Remaining value                     |              |             |             |             |             |             |             |             |             |             |             |
| Steam plant writedown               | 4.46%        | 4.46%       | 4.46%       | 4.46%       | 4.46%       | 4.46%       | 4.46%       | 4.46%       | 4.46%       | 4.46%       | 4.46%       |
| Depreciation charge                 | 2,557,238    | 2,556,665   | 2,557,238   | 2,556,665   | 2,557,238   | 2,556,665   | 2,557,238   | 2,556,665   | 2,557,238   | 2,556,665   | 2,557,238   |
| Remaining value                     | 29,404,796   | 26,848,131  | 24,290,893  | 21,734,229  | 19,176,991  | 16,620,326  | 14,063,088  | 11,506,424  | 8,949,186   | 6,392,521   | 3,835,284   |
| Net revenue                         | 42,425,520   | 44,587,515  | 46,490,006  | 46,921,851  | 46,921,278  | 46,921,851  | 46,921,278  | 46,490,579  | 46,921,278  | 46,921,851  | 46,921,278  |
| Losses forward                      | (30,934,495) | 0           | 0           | 0           | 0           | 0           | 0           | 0           | 0           | 0           | 0           |
| Taxable income                      | 11,491,025   | 44,587,515  | 46,490,006  | 46,921,851  | 46,921,278  | 46,921,851  | 46,921,278  | 46,490,579  | 46,921,278  | 46,921,851  | 46,921,278  |
| Income tax                          | 4,021,859    | 15,605,630  | 16,271,502  | 16,422,648  | 16,422,447  | 16,422,648  | 16,422,447  | 16,271,703  | 16,422,447  | 16,422,648  | 16,422,447  |
| Annual cash income                  | 13,943,120   | 2,359,349   | 32,775,742  | 33,055,868  | 33,056,069  | 33,055,868  | 33,056,069  | 32,775,541  | 33,056,069  | 33,055,868  | 33,056,069  |
| Discount factor                     | 0.4241       | 0.3855      | 0.3505      | 0.3186      | 0.2897      | 0.2633      | 0.2394      | 0.2176      | 0.1978      | 0.1799      | 0.1635      |
| Annual present value                | 5,913,244    | 909,631     | 11,487,697  | 10,532,618  | 9,575,166   | 8,704,643   | 7,913,360   | 7,132,913   | 6,539,967   | 5,945,388   | 5,404,931   |
| Total capital investment + interest |              |             |             |             |             |             |             |             |             |             |             |



| Year                                | 20          | 21          | 22          | 23          | 24          | 25          | 26          | 27          | 28          | 29          | 30           |
|-------------------------------------|-------------|-------------|-------------|-------------|-------------|-------------|-------------|-------------|-------------|-------------|--------------|
| Fixed capital investment            |             |             |             |             |             |             |             |             |             |             |              |
| Land                                |             |             |             |             |             |             |             |             |             |             | (1,848,000)  |
| Working capital                     |             |             |             |             |             |             |             |             |             |             | (17,621,533) |
| Loan payment                        | 0           | 0           | 0           | 0           | 0           | 0           | 0           | 0           | 0           | 0           | 0            |
| Loan interest payment               | 0           | 0           | 0           | 0           | 0           | 0           | 0           | 0           | 0           | 0           | 0            |
| Loan principal                      | 0           | 0           | 0           | 0           | 0           | 0           | 0           | 0           | 0           | 0           | 0            |
| Ethanol sales                       | 113,245,678 | 113,245,678 | 113,245,678 | 113,245,678 | 113,245,678 | 113,245,678 | 113,245,678 | 113,245,678 | 113,245,678 | 113,245,678 | 113,245,678  |
| By-product (electricity) credit     | 9,556,066   | 9,556,066   | 9,556,066   | 9,556,066   | 9,556,066   | 9,556,066   | 9,556,066   | 9,556,066   | 9,556,066   | 9,556,066   | 9,556,066    |
| Total annual sales                  | 122,801,744 | 122,801,744 | 122,801,744 | 122,801,744 | 122,801,744 | 122,801,744 | 122,801,744 | 122,801,744 | 122,801,744 | 122,801,744 | 122,801,744  |
| Annual manufacturing cost           |             |             |             |             |             |             |             |             |             |             |              |
| Feedstock                           | 45,220,500  | 45,220,500  | 45,220,500  | 45,220,500  | 45,220,500  | 45,220,500  | 45,220,500  | 45,220,500  | 45,220,500  | 45,220,500  | 45,220,500   |
| Baghouse bags                       |             | 431,272     |             |             |             |             | 431,272     |             |             |             |              |
| Other variable costs                | 17,809,374  | 17,809,374  | 17,809,374  | 17,809,374  | 17,809,374  | 17,809,374  | 17,809,374  | 17,809,374  | 17,809,374  | 17,809,374  | 17,809,374   |
| Fixed operating costs               | 10,293,354  | 10,293,354  | 10,293,354  | 10,293,354  | 10,293,354  | 10,293,354  | 10,293,354  | 10,293,354  | 10,293,354  | 10,293,354  | 10,293,354   |
| Total product cost                  | 73,323,228  | 73,754,500  | 73,323,228  | 73,323,228  | 73,323,228  | 73,323,228  | 73,754,500  | 73,323,228  | 73,323,228  | 73,323,228  | 73,323,228   |
| Annual depreciation                 |             |             |             |             |             |             |             |             |             |             |              |
| General plant writedown             |             |             |             |             |             |             |             |             |             |             |              |
| Depreciation charge                 |             |             |             |             |             |             |             |             |             |             |              |
| Remaining value                     |             |             |             |             |             |             |             |             |             |             |              |
| Steam plant writedown               | 4.46%       | 2.23%       |             |             |             |             |             |             |             |             |              |
| Depreciation charge                 | 2,556,665   | 1,278,619   |             |             |             |             |             |             |             |             |              |
| Remaining value                     | 1,278,619   | 0           |             |             |             |             |             |             |             |             |              |
| Net revenue                         | 46,921,851  | 47,768,625  | 49,478,516  | 49,478,516  | 49,478,516  | 49,478,516  | 49,047,244  | 49,478,516  | 49,478,516  | 49,478,516  | 49,478,516   |
| Losses forward                      | 0           | 0           | 0           | 0           | 0           | 0           | 0           | 0           | 0           | 0           | 0            |
| Taxable income                      | 46,921,851  | 47,768,625  | 49,478,516  | 49,478,516  | 49,478,516  | 49,478,516  | 49,047,244  | 49,478,516  | 49,478,516  | 49,478,516  | 49,478,516   |
| Income tax                          | 16,422,648  | 16,719,019  | 17,317,481  | 17,317,481  | 17,317,481  | 17,317,481  | 17,166,535  | 17,317,481  | 17,317,481  | 17,317,481  | 17,317,481   |
| Annual cash income                  | 33,055,868  | 32,328,225  | 32,161,035  | 32,161,035  | 32,161,035  | 32,161,035  | 31,880,708  | 32,161,035  | 32,161,035  | 32,161,035  | 32,161,035   |
| Discount factor                     | 0.1486      | 0.1351      | 0.1228      | 0.1117      | 0.1015      | 0.0923      | 0.0839      | 0.0763      | 0.0693      | 0.0630      | 0.0573       |
| Annual present value                | 4,913,544   | 4,368,531   | 3,950,854   | 3,591,685   | 3,265,168   | 2,968,335   | 2,674,965   | 2,453,169   | 2,230,154   | 2,027,413   | 1,843,102    |
| Total capital investment + interest |             |             |             |             |             |             |             |             |             |             | (1,115,771)  |

## References

- A. McAloon, F. Taylor, W. Yee, K. Ibsen, R. Wooley, *National Renewable Energy Laboratory Report*, NREL/TP-580-28893, 2000.
- Aspen Process Economic Analyzer (APEA) V7.3, Aspen Technology Inc., Cambridge, 2011.
- D. Humbird, R. Davis, L. Tao, C. Kinchin, D. Hsu, A. Aden, P. Schoen, J. Lukas, B. Olthof, M. Worley, D. Sexton, and D. Dudgeon, *National Renewable Energy Laboratory Report*, NREL/TP-5100-47764, 2011.
- F. K. Kazi, J. Fortman, R. Anex, G. Kothandaraman, D. Hsu, A. Aden, and A. Dutta, *National Renewable Energy Laboratory Report*, NREL/TP-6A2-46588, 2010.
- H. Renon and J. M. Prausnitz, *AIChE Journal*, 1968, 14, 135-144.
- J. Han, J. S. Luterbacher, D. M. Alonso, J. A. Dumesic, and C. T. Maravelias, *Bioresource Technology*, 2015, 182, 258-266.
- R. Davis, L. Tao, E. C. D. Tan, M. J. Bidy, G. T. Beckham, C. Scarlata, J. Jacobson, K. Cafferty, J. Ross, J. Lukas, D. Knorr, and P. Schoen, *National Renewable Energy Laboratory Report*, NREL/TP-5100-60223, 2013.
- R. Davis, L. Tao, C. Scarlata, E. C. D. Tan, J. Ross, J. Lukas, and D. Sexton, *National Renewable Energy Laboratory Report*, NREL/TP-5100-62498, 2015.
- R. Turton, R. C. Bailie, W. B. Whiting, J. A. Shaeiwitz, *Analysis, Synthesis, and Design of Chemical Processes*, 4<sup>th</sup> edition, Prentice Hall, 2012.
- S. M. Sen, D. M. Alonso, S. G. Wettstein, E. I. Gürbüz, C. A. Henao, J. A. Dumesic, and C. T. Maravelias, *Energy and Environmental Science*, 2012, 5, 9690-9697.
- S&P Global Platts. <http://www.platts.com/news-feature/2014/petrochemicals/pgpi/toluene>.
